# Supplementary material for: Uniform hollow mesoporous silica nanocages for drug delivery in vitro and in vivo for liver cancer therapy
Source: Royal Society of Chemistry journal article supplement (doi:10.1039/c0jm04115g), 2011-01-01
Supplement: c0jm04115g.pdf [file c0jm04115g.pdf]

Supporting Information

# Uniform Hollow Mesoporous Silica Nanocages for Drug Delivery *in Vitro* and *in Vivo* for Liver Cancer Therapy

Tingting Wang, Fang Chai, Qin Fu, Lingyu Zhang, Haiyan Liu, Lu Li, Yi Liao,

Zhongmin Su,\* Chungang Wang,\* Beiye Duan, Dongxue Ren

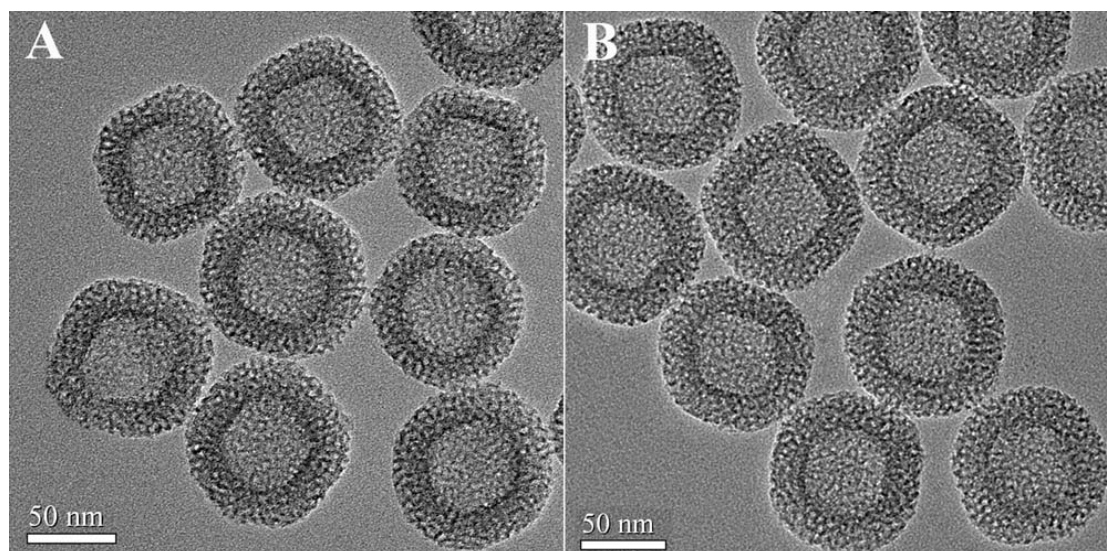

**Figure S1.** TEM images of HMS nanocages in (a) culture media IMDM and (b) saline solution.

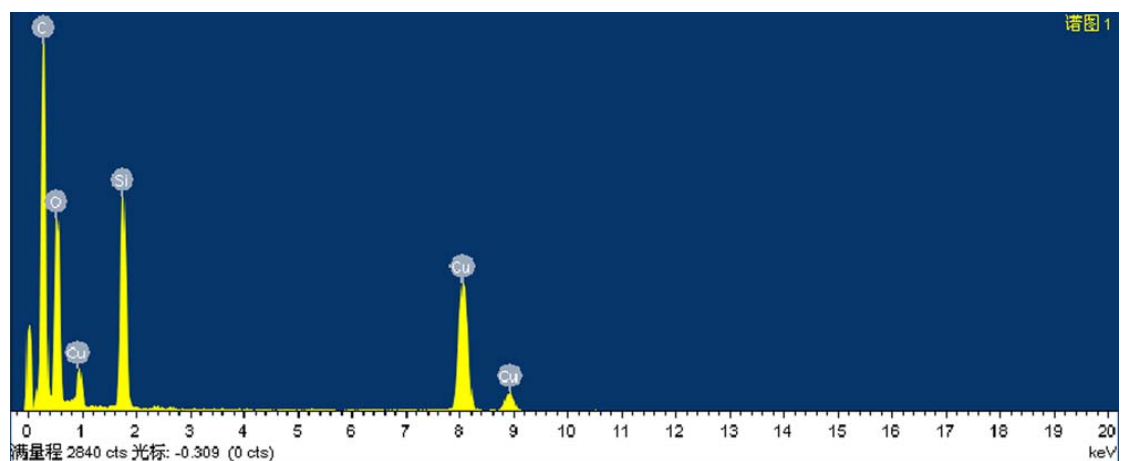

**Figure S2.** EDS spectrum of HMS nanocages.

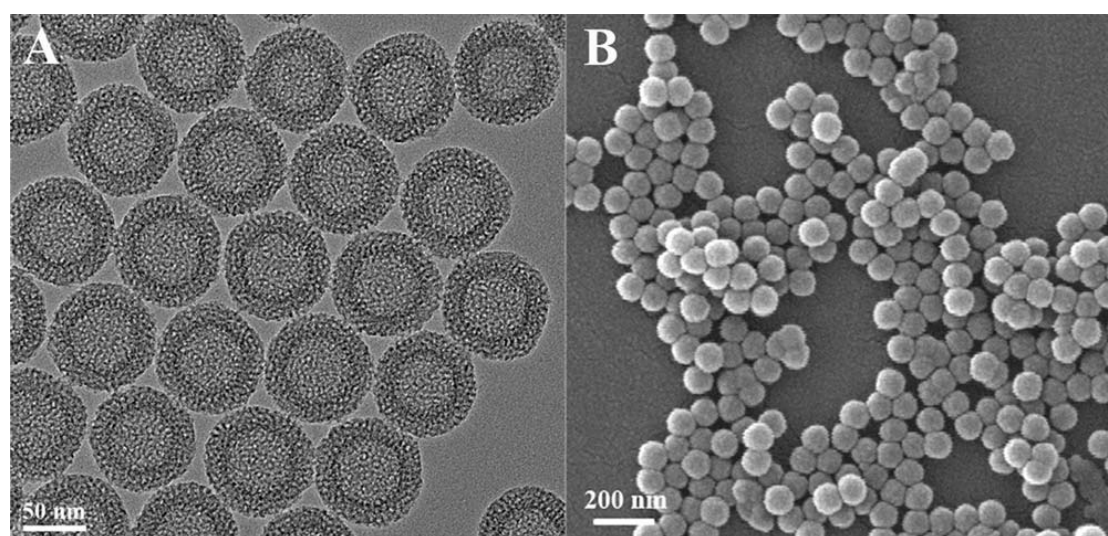

**Figure S3.** TEM image (a) and FE-SEM image (b) of HMS nanocapsules with spherical shape.
